# Supplementary material for: Lewis acidic zeolite Beta catalyst for the Meerwein–Ponndorf–Verley reduction of furfural
Source: Royal Society of Chemistry journal article supplement (doi:10.1039/c5cy01501d), 2015-11-09

**Lewis acidic zeolite Beta catalyst for the Meerwein-Ponndorf-Verley reduction of furfural**

**Supporting Information**

Maura Koehle and Raul F. Lobo

Catalysis Center for Energy Innovation

Department of Chemical and Biomolecular Engineering

University of Delaware, Newark, DE 19716

**Figure S1:** PFD of reaction setup

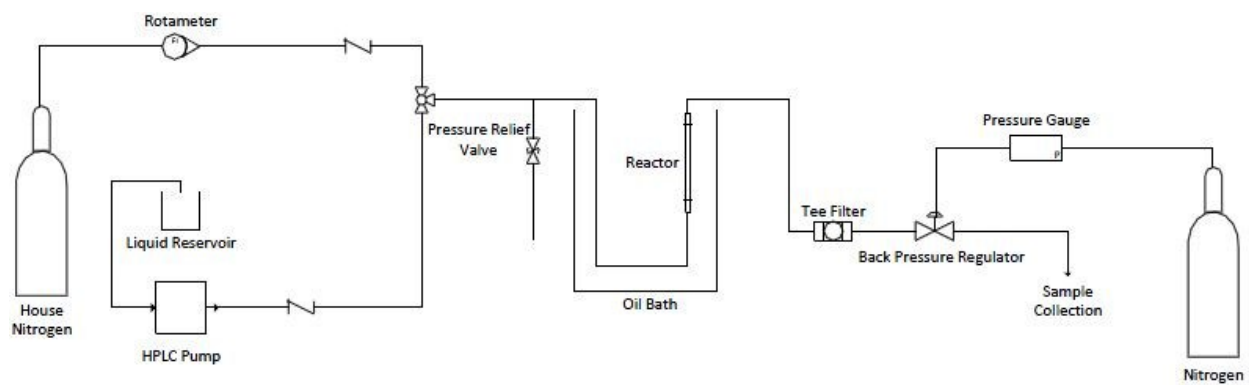

**Figure S2:** Metal-Beta X-Ray Diffraction Patterns. (a) Hf-Beta, (b) Sn-Beta, (c) Zr-Beta, (d) H-Al-Beta (Zeolyst, CP814E)

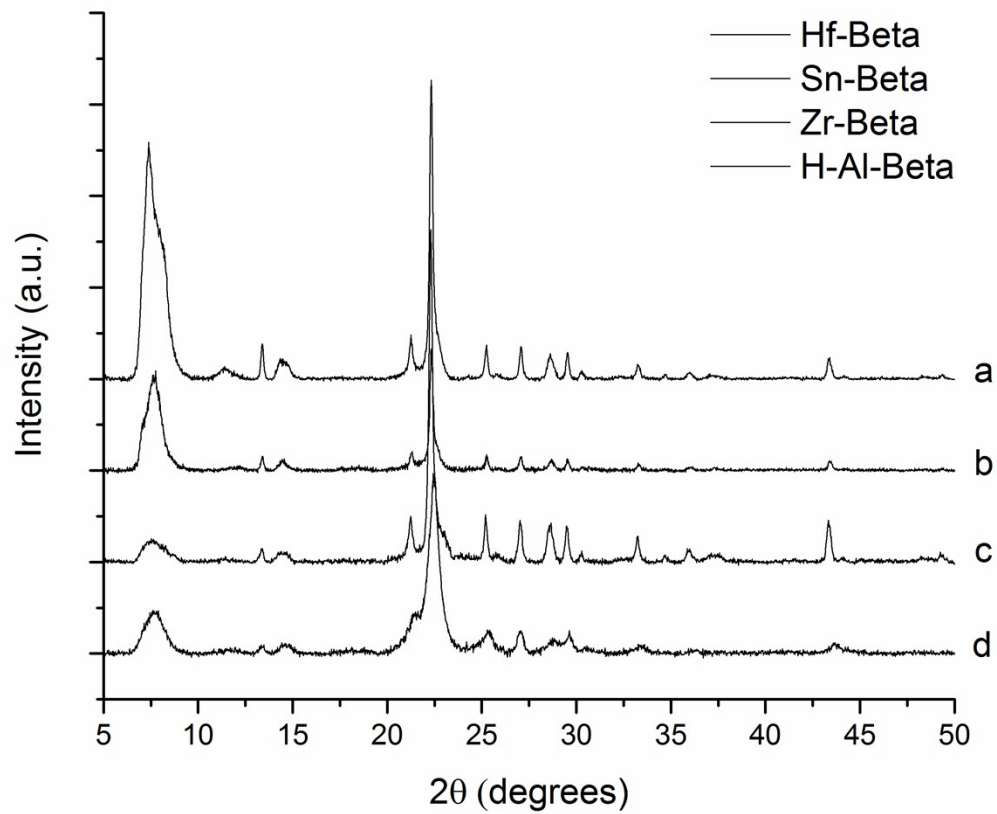

**Figure S3:** UV-Vis spectra of Hf-, Zr-, Sn-Beta

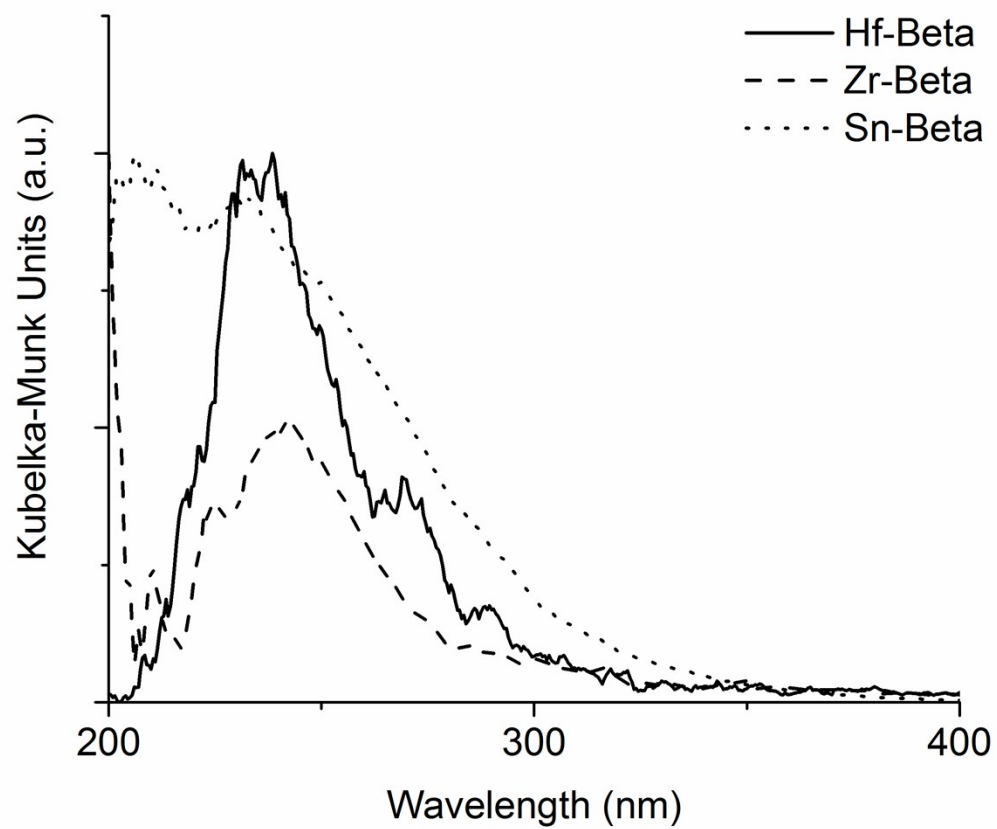

**Figure S4:** Hf-Beta after reaction (left) and after calcination (right)

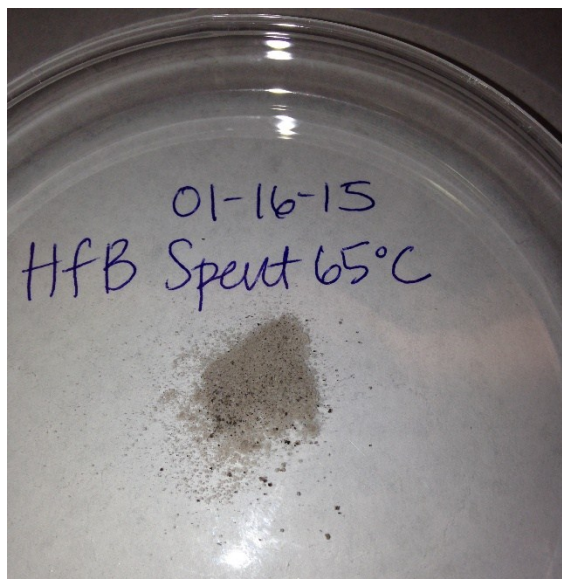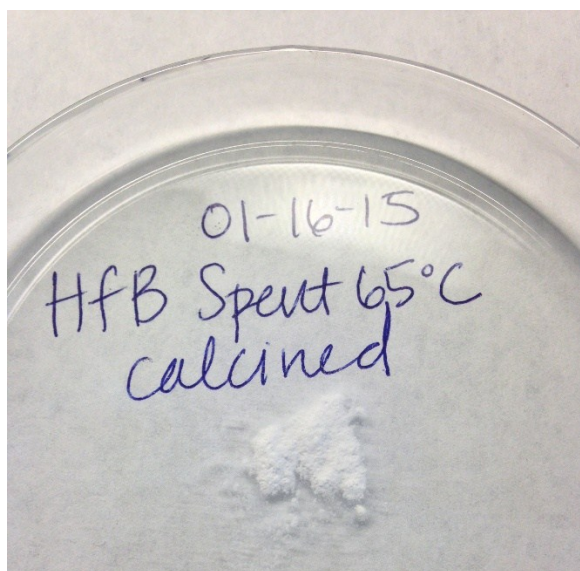

Supplement: c5cy01501d1.pdf [file c5cy01501d1.pdf]
